# Supplementary material for: Screening and identification of a novel antidiabetic peptide from collagen hydrolysates of Chinese giant salamander skin: network pharmacology, inhibition kinetics and protection of IR-HepG2 cells
Source: Royal Society of Chemistry journal article supplement (doi:10.1039/d1fo03527d), 2022-01-01
Supplement: d1fo03527d1.pdf [file d1fo03527d1.pdf]

Table S1 Selecting of the target crystal structures

| Targets                                | Crystals (PPI) | Resolution | Unique Ligand | Contains site | Positions | Pocket integrity |
|----------------------------------------|----------------|------------|---------------|---------------|-----------|------------------|
| AKTI                                   | 1UNQ           | 0.98 Å     | 4IP           | -             | 1-123     |                  |
| RAC-alpha                              | 3O96           | 2.70 Å     | IQO           |               | 2-443     |                  |
| serine/threonine-<br>protein kinase    | 4EJN           | 2.19 Å     | 0R4, SBT, EDO |               | 2-446     |                  |
|                                        | 4GV1           | 1.49 Å     | 0XZ, GOL      |               | 144-480   |                  |
| MAPK8                                  | 2XRW           | 1.33 Å     | ANP, GOL      |               | 2-364     |                  |
| Mitogen-activated<br>protein kinase 8  | 4YR8           | 2.40 Å     | -             |               | 1-363     |                  |
| MAPK10                                 | 3TTJ           | 2.10 Å     | JBI           |               | 1-464     |                  |
| Mitogen-activated<br>protein kinase 10 | 4W4Y           | 2.30 Å     | 3HQ           |               | 39-402    |                  |
| JUN<br>Transcription factor<br>AP-1    | 1JUN           | -          | -             | -             | 276-314   |                  |
|                                        | 1JNM           | 2.20 Å     | -             |               | 254-315   |                  |
|                                        | 1S9K           | 3.10 Å     | -             |               | 257-308   |                  |
|                                        | 1FOS           | 3.05 Å     | -             |               | 254-315   |                  |

Note: “-” means there had no ligands, no resolution, no contains site, no pocket integrity could be found in the crystals.

Table S2 Molecular docking for GPPGPA and core targets, including mass, pI, hydrophilicity, binding targets and HPEPDOCK Score

| Peptides | Molecular weight | pI   | Hydrophilicity | Binding targets | HPEPDOCK Score |
|----------|------------------|------|----------------|-----------------|----------------|
| GPPGPA   | 494.55           | 5.52 | -0.633         | 3O96-AKT1       | -126.649       |
|          |                  |      |                | 2XRW-MAPK8      | -115.549       |
|          |                  |      |                | 3TTJ-MAPK10     | -122.139       |
|          |                  |      |                | 1JNM-JUN        | -161.570       |

Table S3 Negative docking

| NO. | Peptide | HPEPDOCK score |          |          |          |
|-----|---------|----------------|----------|----------|----------|
|     |         | AKT1           | MAPK8    | MAPK10   | JUN      |
| 1   | GGAPPP  | -131.948       | -111.126 | -109.827 | -174.802 |
| 2   | GGPPAP  | -124.76        | -111.071 | -111.955 | -176.202 |
| 3   | GGPPPA  | -125.898       | -113.680 | -118.552 | -161.585 |
| 4   | GGPAPP  | -133.647       | -111.587 | -112.066 | -177.377 |
| 5   | GPGPAP  | -130.312       | -110.633 | -114.083 | -176.513 |
| 6   | GPGPPA  | -131.711       | -111.516 | -107.781 | -170.345 |
| 7   | GPGAPP  | -133.762       | -113.435 | -111.275 | 173.673  |
| 8   | GPAGPP  | -133.841       | -113.253 | -118.052 | -165.873 |
| 9   | GPAPGP  | -135.21        | -112.426 | -112.811 | -164.498 |
| 10  | GPAPPG  | -124.038       | -109.299 | -112.165 | -171.812 |
| 11  | GPPGPA  | -126.649       | -115.549 | -122.139 | -161.57  |
| 12  | GPPGAP  | -131.642       | -108.096 | -119.388 | -166.581 |
| 13  | GPPPGA  | -120.995       | -115.116 | -113.916 | -159.509 |
| 14  | GPPPAG  | -129.7         | -112.844 | -108.185 | -157.755 |
| 15  | GPPAGP  | -124.424       | -111.784 | -109.036 | -163.253 |
| 16  | GPPAPG  | -132.355       | -121.325 | -117.92  | -169.066 |
| 17  | GAGPPP  | -135.538       | -108.024 | -107.075 | -171.59  |
| 18  | GAPGPP  | -123.587       | -110.993 | -108.834 | -167.873 |
| 19  | GAPPPG  | -121.729       | -125.618 | -105.935 | -159.3   |
| 20  | GAPPGP  | -125.704       | -109.769 | -108.821 | -161.896 |
| 21  | PGGPPA  | -148.075       | -123.873 | -125.803 | -184.802 |
| 22  | PGGPAP  | -144.065       | -124.276 | -125.426 | -194.517 |
| 23  | PGGAPP  | -142.971       | -118.888 | -125.302 | -183.511 |
| 24  | PGPGPA  | -149.191       | -125.941 | -131.596 | -185.491 |
| 25  | PGPGAP  | -145.981       | -125.266 | -137.015 | -189.67  |
| 26  | PGPPGA  | -140.681       | -121.097 | -127.254 | -189.846 |
| 27  | PGPPAG  | -147.79        | -124.704 | -115.477 | -193.462 |
| 28  | PGPAGP  | -151.416       | -128.513 | -127.021 | -188.69  |
| 29  | PGPAPG  | -138.498       | -118.193 | -129.894 | -191.904 |
| 30  | PGAGPP  | -133.327       | -125.503 | -124.289 | -200.87  |
| 31  | PGAPGP  | -151.092       | -124.877 | -126.667 | -198.09  |
| 32  | PGAPPG  | -139.475       | -123.646 | -122.364 | -191.561 |
| 33  | PPGGAP  | -147.316       | -133.275 | -134.98  | -186.397 |

|    |         |          |          |          |          |
|----|---------|----------|----------|----------|----------|
| 34 | PPGGPA  | -150.732 | -128.048 | -130.738 | -206.514 |
| 35 | PPGPAG  | -152.026 | -129.187 | -128.134 | -176.203 |
| 36 | PPGPGA  | -164.452 | -129.477 | -131.539 | -184.98  |
| 37 | PPGAPG  | -144.838 | -136.154 | -140.635 | -193.796 |
| 38 | PPGAGP  | -148.525 | -139.755 | -130.989 | -187.961 |
| 39 | PPPGGGA | -149.623 | -125.464 | -130.898 | -181.873 |
| 40 | PPPAGAG | -145.158 | -119.443 | -137.729 | -183.113 |
| 41 | PPPAGG  | -148.422 | -123.859 | -121.261 | -191.363 |
| 42 | PPAGGP  | -148.724 | -123.938 | -119.934 | -183.365 |
| 43 | PPAGPG  | -158.573 | -133.769 | -130.269 | -183.203 |
| 44 | PPAPGG  | -154.771 | -127.266 | -123.858 | -182.445 |
| 45 | PAPGGP  | -169.864 | -125.925 | -138.56  | -190.728 |
| 46 | PAPGPG  | -152.593 | -128.680 | -129.66  | -189.684 |
| 47 | PAPPGG  | -144.804 | -131.712 | -123.047 | -191.473 |
| 48 | PAGGPP  | -145.776 | -120.606 | -129.991 | -190.546 |
| 49 | PAGPPG  | -158.431 | -126.073 | -135.34  | -187.999 |
| 50 | PAGPGP  | -160.481 | -127.451 | -121.789 | -187.013 |
| 51 | APGGPP  | -131.188 | -108.886 | -118.256 | -172.674 |
| 52 | APGPGP  | -137.627 | -109.847 | -112.988 | -170.096 |
| 53 | APGPPG  | -129.07  | -113.571 | -113.457 | -174.315 |
| 54 | APPGPG  | -127.334 | -118.132 | -121.826 | -176.491 |
| 55 | APPGGP  | -134.97  | -115.463 | -109.217 | -165.888 |
| 56 | APPPGG  | -128.716 | -123.250 | -114.978 | -157.288 |
| 57 | AGGPPP  | -126.95  | -104.120 | -112.458 | -177.039 |
| 58 | AGPGPP  | -134.816 | -116.961 | -111.709 | -166.405 |
| 59 | AGPPGP  | -129.164 | -111.317 | -123.474 | -177.773 |
| 60 | AGPPPG  | -129.419 | -112.071 | -114.441 | -175.771 |

AKT1: 52/60

MAPK8: 36/60

MAPK10: 28/60

JUN: 55/60
